# Supplementary material for: Comparing serotyping with whole-genome sequencing for subtyping of non-typhoidal Salmonella enterica: a large-scale analysis of 37 serotypes with a public health impact in the USA
Source: PubMed Central journal article supplement — Microb Genom. 2020 Aug 26;6(9):mgen000425. doi: 10.1099/mgen.0.000425 (PMC7643971; doi:10.1099/mgen.0.000425), 2020-08-26

## 1 **Supplementary Materials**

### 2 **Study Population**

3 The National Center for Biotechnology Information (NCBI) ‘pathogen detection’  
4 repository (<https://www.ncbi.nlm.nih.gov/pathogens>) *Salmonella* metadata was first  
5 downloaded (13 October 2017) and explored to identify non-typhoidal *Salmonella* (NTS)  
6 isolates recovered in the U.S. between 2006 and 2017 and for which data on the ‘Run  
7 number’ and the ‘serotype’ was available. For isolates with only the ‘Biosample’  
8 information, ‘Run numbers’ were retrieved (in batches) separately from the Sequence Read  
9 Archive (SRA)-NCBI repository, when available.

10 A local dictionary of the serotype and equivalent antigenic formula for NTS serotypes was  
11 created based on ‘SNOMED Clinical Terms’ at the national center for biomedical ontology  
12 (NCBO) website (<http://bioportal.bioontology.org/ontologies/>; SNOMED classes:  
13 Organism> Microorganism> Prokaryote> Bacteria> *Salmonella*). The dictionary was used  
14 to unify the serotype naming in the metadata.

15 Overall, 28,494 sequences of NTS isolates belonging to 281 serotypes were identified.

16 Focusing on serotypes of public-health impact, the data was filtered to include only  
17 serotypes that had at least 100 isolates and at least one isolate was retrieved from humans.

18 The filtered selection included 25,897 sequences of isolates belonging to 37 serotypes.

19 Collection sources were categorized into five categories: human, bovine (animal and food  
20 products), poultry (animal and food products), porcine (animal and food products) and  
21 other (including environmental, wildlife, domestic animals and non-available sources).

22 Categorization was based on the NCBI metadata in columns ‘Host’, ‘Host disease’,

23 'Isolation source' (Included in **Table S1**). In addition, 3,376 samples isolated from stool or  
24 other body secretions that were sequenced by the Enteric Diseases Laboratory Branch  
25 (EDLB) of the Centers for Disease Control and Prevention (CDC), were categorized as  
26 'Human' source unless indicated otherwise.

## 27 **Data Analysis**

### 28 **Data quality**

29 For each serotype, paired-end Illumina reads were downloaded from NCBI's ftp server (75  
30 isolates were excluded at this step as their raw reads were not available at NCBI sequence  
31 read archive (SRA) repository) and reads quality was assessed using FASTQC v0.11.6 [1].  
32 De-novo genome assemblies were conducted using 'SPAdes' *de novo* assembler v3.12.0  
33 [2] with the "careful" option in order to reduce short indels and minimize the number of  
34 mismatches in the final assembly. When required, the 'repair.sh' command in BBmap  
35 v38.06 [3] was used to fix disordered raw reads before reassembly. The assemblies N50  
36 were calculated using QUAST v4.6.3 [4] and assemblies with N50 lower than 30,000 base  
37 pairs (bp; n=188) were excluded from the analysis. The *Salmonella* In Silico Typing  
38 Resource (SISTR) v1.0.2 [5] was used, and only sequences with predicted serotypes (by  
39 both the serover antigen and cgmlst) that were in agreement with the serotype as defined in  
40 the metadata were further analyzed (1,497 isolates were excluded from the analysis in this  
41 step). The serotype Typhimurium var. -5 (i.e. Copenhagen) was predicted by SISTR as *S.*  
42 Typhimurium and therefore, in this case, the SISTR output was only used to verify that *S.*  
43 Copenhagen isolates were identified as *S.* Typhimurium and not any other serotype.  
44 The average coverage depth of the assemblies was estimated after completion of the  
45 analysis (i.e. after removal of genetic duplicates, see below). For this purpose, reads were

46 aligned to the contig assemblies using bowtie2 v2.3.4.1 [6] and BBmap [3] was used to  
47 calculate the average coverage depth of the contigs. In 18,211/18,282 (99.6%) of the  
48 sequences the average coverage was at least 20, in 39/18,282 (0.21%) of the sequences the  
49 average coverage was below 20 and in 33/18,282 (0.18%) of the sequences the average  
50 coverage could not be calculated as the raw reads were not available for downloading from  
51 NCBI anymore. The sequences with the low (below 20) and unknown average coverage  
52 were not removed from the analysis, however given the amount of isolates included in  
53 these groups (0.39% of all sequences analyzed here) it is not likely that their inclusion has  
54 affected the analysis outcomes.

### 55 ***Genetic analyses***

#### 56 Serotype phylogenies reconstruction

57 Before using ‘FastTree’ v2.1.10 [7] for phylogeny reconstruction of each serotype,  
58 genetically identical duplicates were removed from the analysis [overall 5,855 sequences  
59 were removed; up to 27 duplicates were removed in 50% of the serotypes and the highest  
60 and lowest number of duplicates were removed in *S. Enteritidis* (n=3,042) and *S.*  
61 *Johannesburg* (n=3)].

62 Packages ‘ape’ v5.0 [8] and ‘ggtree’ v1.10.5 [9] in R software v3.4.3 [10] were used for  
63 visualization. In the final (FastTree) phylogenetic trees, 195 sequences were removed to  
64 improve the visualization. These sequences (outliers) included individual sequences or  
65 small groups of similar sequences (up to five sequences) demonstrating high dissimilarity  
66 to other sequences within the serotype (i.e. longer tree branches), yet neither low quality of  
67 the data nor misidentification of the serotype was evident. Up to three outliers were  
68 identified in 50% of the serotypes; none were found in nine serotypes and the highest

69 number of outlier sequences was found in *S. Javiana* (n=32). The outlier sequences were  
70 analyzed as part of each serotype analysis, yet were removed from the final trees to  
71 improve the visualization of the genetic subpopulations within each serotype.

72 A scheme of the pipeline used in the analyses: metadata filtration, data quality assessment  
73 and genetic analyses is illustrated in **figure S1**.

#### 74 *Data interpretation*

##### 75 Comparison between [subtyping](#) by serotypes and genetic subpopulations

76 Data of the genetic characteristics [i.e. presence of acquired antimicrobial resistance genes  
77 (AARGs), multilocus sequence types (MLST) and plasmid replicons) were summarized for  
78 each serotype and its genetic subpopulations (**Table S2**). For this purpose, the serotypes  
79 data was stratified by genetic subpopulations. Then, for each antibiotic class [i.e. beta-  
80 lactams; aminoglycosides; folate pathway inhibitors; tetracyclines; macrolide and  
81 lincosamide (including sulphamide and trimethoprim); quinolones; phenicols; and others  
82 (including colistin, fosfomycin, fusidic acid, glycopeptide, nitroimidazole, oxazolidinone  
83 and rifampicin)] the number of sequences harboring AARGs and the percentage of  
84 sequences harboring AARGs within the genetic subpopulation were calculated. In addition,  
85 similar information was summarized for predominant AARGs (i.e. found in at least 10% of  
86 the sequences within the subpopulation) in each antibiotic class. However, for beta lactams  
87 and quinolones, the data was summarized for all AARGs that were found. The MLST and  
88 plasmid replicons were summarized for predominant types only (i.e. found in at least 10%  
89 of the sequences within the subpopulation).

90 In addition, to described above and in the text, the following packages in R software v3.4.3  
91 [10] were used: (i) for data manipulation and summarization – dplyr v0.8.0.1 [11],  
92 lettercase v0.13.1 [12], stringr v1.2.0 [13], tidyr v0.8.0 [14] and xlsx v0.5.7 [15]; for  
93 creating and formatting the figures - cowplot v0.9.2 [16], Hmisc v4.1.1 [17], ggplot2  
94 v2.2.1 [18], ggpubr v0.2 [19] and gridExtra v2.3 [20].

95

## 96 **References**

- 97 1. **Andrews S.** FastQC: a quality control tool for high throughput sequence data. 2010.  
98 <http://www.bioinformatics.babraham.ac.uk/projects/fastqc>.
- 99 2. **Bankevich A, Nurk S, Antipov D, Gurevich AA, Dvorkin M et al.** SPAdes: a new genome  
100 assembly algorithm and its applications to single-cell sequencing. *J Comput Biol*  
101 2012;19(5):455-477.
- 102 3. **Bushnell B.** BBMap short-read aligner, and other bioinformatics tools.  
103 <http://sourceforge.net/projects/bbmap/>.
- 104 4. **Gurevich A, Saveliev V, Vyahhi N, Tesler G.** QUASt: quality assessment tool for genome  
105 assemblies. *Bioinformatics* 2013;29(8):1072-1075.
- 106 5. **Yoshida CE, Kruczkiewicz P, Laing CR, Lingohr EJ, Gannon VP et al.** The *Salmonella* In Silico  
107 Typing Resource (SISTR): An Open Web-Accessible Tool for Rapidly Typing and Subtyping  
108 Draft *Salmonella* Genome Assemblies. *PLoS One* 2016;11(1):e0147101.
- 109 6. **Langmead B, Salzberg SL.** Fast gapped-read alignment with Bowtie 2. *Nat Methods*  
110 2012;9(4):357-359.
- 111 7. **Price MN, Dehal PS, Arkin AP.** FastTree 2--approximately maximum-likelihood trees for  
112 large alignments. *PLoS One* 2010;5(3):e9490.

- 113 8. **Paradis E, Claude J, Strimmer K.** APE: Analyses of Phylogenetics and Evolution in R  
114 language. *Bioinformatics* 2004;20(2):289-290.
- 115 9. **Yu G, Smith DK, Zhu H, Guan Y, Lam TTY.** ggtree: an R package for visualization and  
116 annotation of phylogenetic trees with their covariates and other associated data. *Methods*  
117 *in Ecology and Evolution* 2017;8(1):28-36.
- 118 10. **R Core Team.** R: A language and environment for statistical computing. Vienna, Austria;  
119 2016. <https://www.R-project.org/>.
- 120 11. **Wickham H, Francois, R., Henry, L., Müller, K.** dplyr: A Grammar of Data Manipulation. R  
121 package version 0.7.4. 2017. <https://CRAN.R-project.org/package=dplyr>.
- 122 12. **Brown C.** lettercase: Utilities for Formatting Strings with Consistent Capitalization, Word  
123 Breaks and White Space version 0.13.1. 2016. [https://CRAN.R-](https://CRAN.R-project.org/package=lettercase)  
124 [project.org/package=lettercase](https://CRAN.R-project.org/package=lettercase).
- 125 13. **Wickham H.** 2015. stringr: Simple, Consistent Wrappers for Common String Operations.  
126 <https://CRAN.R-project.org/package=stringr> [accessed].
- 127 14. **Wickham H, Henry, L. , .** tidyr: Easily Tidy Data with 'spread()' and 'gather()' Functions. R  
128 package version 0.8.0. 2018. <https://CRAN.R-project.org/package=tidyr>.
- 129 15. **Dragulescu AA.** xlsx: Read, write, format Excel 2007 and Excel 97/2000/XP/2003 files. R  
130 package version 0.5.7. 2014. <https://CRAN.R-project.org/package=xlsx>.
- 131 16. **Wilke CO.** cowplot: Streamlined Plot Theme and Plot Annotations for 'ggplot2' version  
132 0.9.2. 2017. <https://CRAN.R-project.org/package=cowplot>.
- 133 17. **Frank E.** Hmisc: Harrell Miscellaneous. R package version 4.1-1. [https://CRAN.R-](https://CRAN.R-project.org/package=Hmisc)  
134 [project.org/package=Hmisc](https://CRAN.R-project.org/package=Hmisc); 2018.
- 135 18. **Wickham H.** *Ggplot2 : elegant graphics for data analysis*. New York: Springer; 2009.

- 136 19. **Kassambara A.** ggpubr: 'ggplot2' Based Publication Ready Plots. R package version 0.2.  
137 2018. <https://CRAN.R-project.org/package=ggpubr>.
- 138 20. **Auguie B.** gridExtra: Miscellaneous Functions for "Grid" Graphics. R package version 2.3.  
139 2017. <https://CRAN.R-project.org/package=gridExtra>.

140

141

142

143

144

145

146

147

148

149

150

151

152

153

154

155 **Supplementary figure captions**

156 **Figure S1** – A scheme of the pipeline used in the analyses: metadata filtration (yellow  
157 box), data quality assessment (green box) and genetic analyses (purple box). Infographics  
158 were created using ‘draw.io’ website. Notes: <sup>a</sup> average coverage was estimated for the final  
159 18,282 sequences only (see Supplementary text); <sup>b</sup> outliers were only removed from the  
160 final phylogenetic trees figures (see Supplementary text); <sup>c</sup> the final number of sequences  
161 analyzed after exclusion of duplicates (but not the outliers; see Supplementary text).

162 **Figure S2** – The percentage of sequences that were obtained from each source are  
163 presented for each genetic subpopulation within serotype. Barplots were generated for each  
164 of the 37 serotypes included in the study. Bars are colored according to the source: human  
165 (purple), bovine (blue), poultry (brown), porcine (orange) and other (grey). The number of  
166 sequences included in each subpopulation/serotype are indicated above each bar column.  
167 The ‘Total’ column includes the sum of all subpopulations within serotype in addition to  
168 sequences (of that serotype) that were not grouped in any of the subpopulations (see  
169 supplementary material text for details).

170 **Figure S3** – The percentage of sequences that were obtained from each collection period in  
171 each genetic subpopulation within serotype. Barplots were generated for each of the 37  
172 serotypes included in the study. Bars are colored according to the collection period: 2006-  
173 2009 (blue), 2010-2013 (green) and 2014-2017 (red). The number of sequences included in  
174 each subpopulation/serotype are indicated above each bar column. The ‘Total’ column  
175 includes the sum of all subpopulations within serotype in addition to sequences (of that  
176 serotype) that were not grouped in any of the subpopulations (see supplementary material  
177 text for details).



178 **Figure S4** – A maximum likelihood phylogenetic tree was reconstructed with RAxML  
179 using the single nucleotide polymorphisms (SNPs) found in the core genome of  
180 representative sequences from all 37 serotypes (n=370). Ten sequences were selected from  
181 each serotype phylogeny to represent the diversity of the genetic subpopulations. The tree  
182 was rooted using *S. Paratyphi* type A outgroup (SRR3033248, SRR3277289; not included  
183 in the figure). Bootstrap replicates (n=5,000) were used for branch support. Tree tips were  
184 colored according to the serotype and the genetic subpopulation number was indicated in  
185 the tip name.

186 **Figure S5** – The percentage of plasmid size groups found in each genetic subpopulation  
187 within serotype. Barplots were generated for each of the 37 serotypes included in the study.  
188 Bars are colored according to the plasmid size groups: ‘small’- up to 6kbp (Purple);  
189 ‘intermediate’- between 6kbp and 100kbp (yellow); and ‘large’- more than 100kbp (dark  
190 red). The number of sequences in each subpopulation/serotype are indicated above each  
191 bar column. The ‘Total’ column includes the sum of all subpopulations within serotype  
192 (see supplementary material text for details).

193

194

195

196

197

198

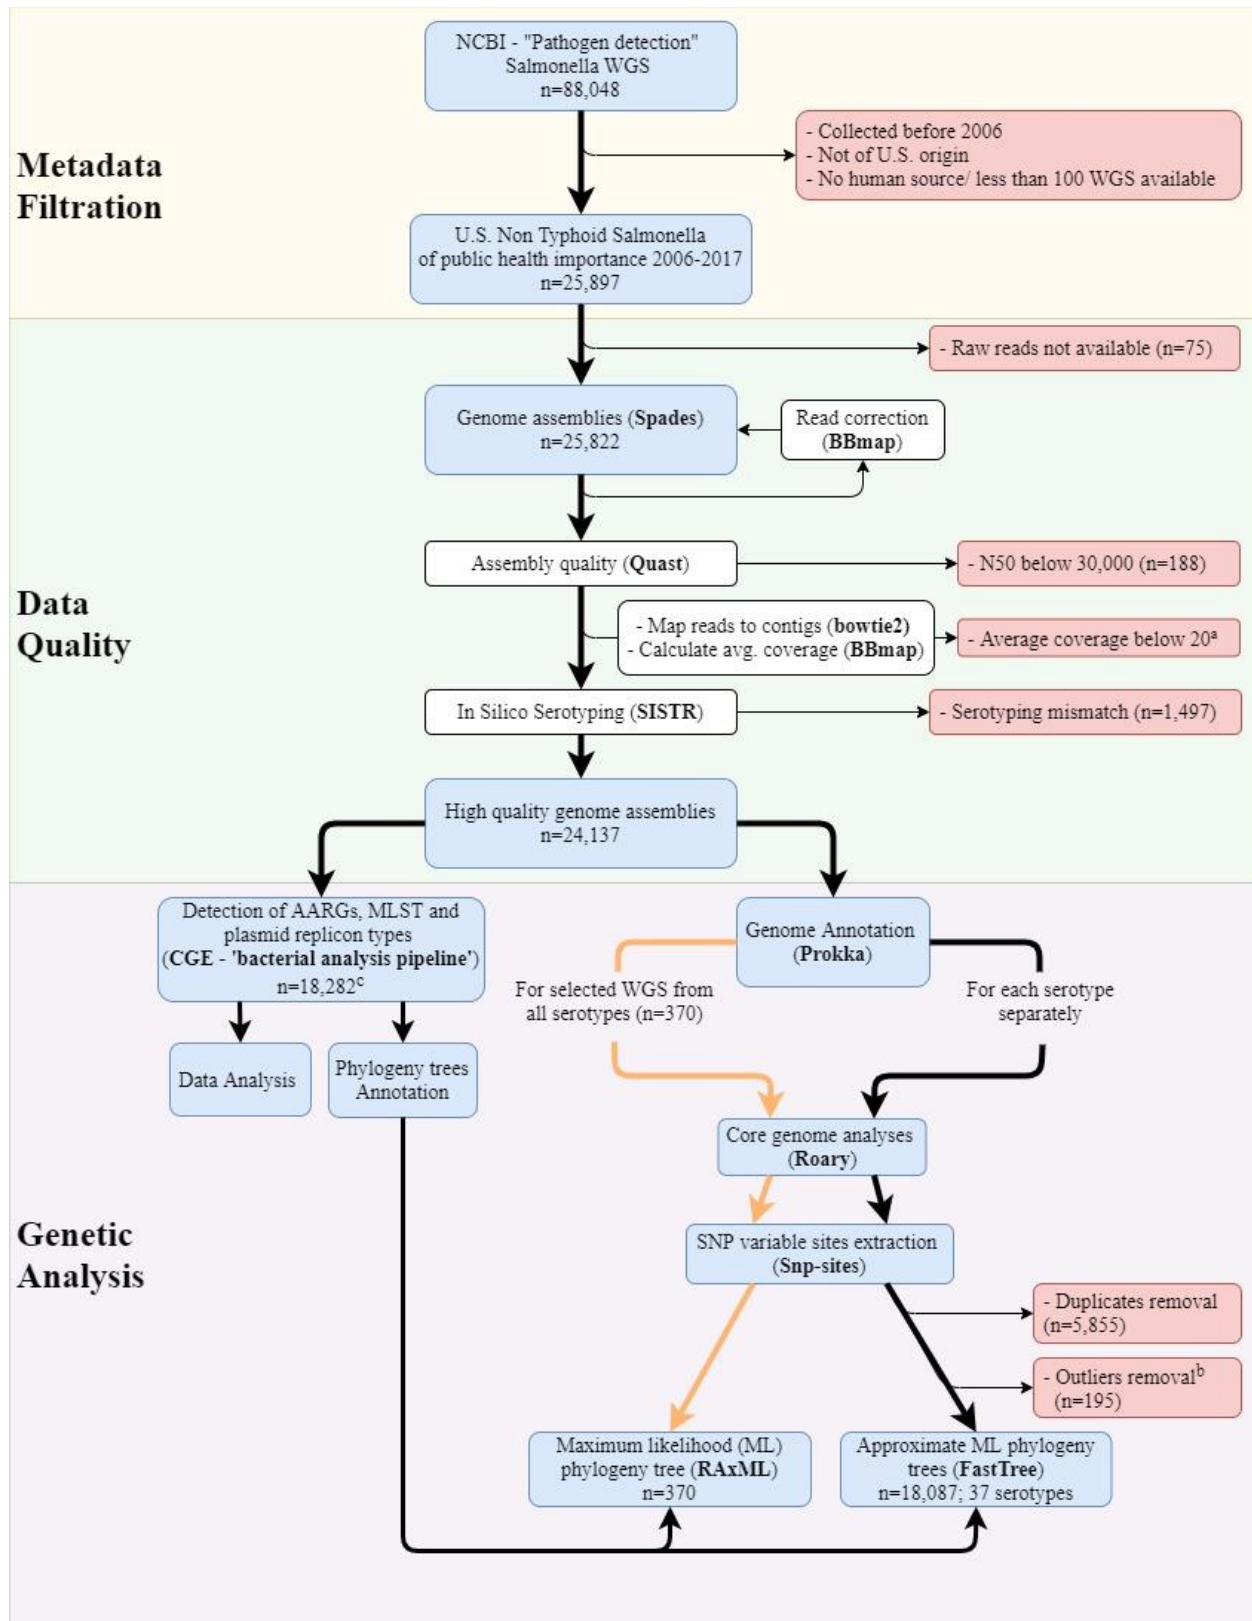

201 **Figure S2**

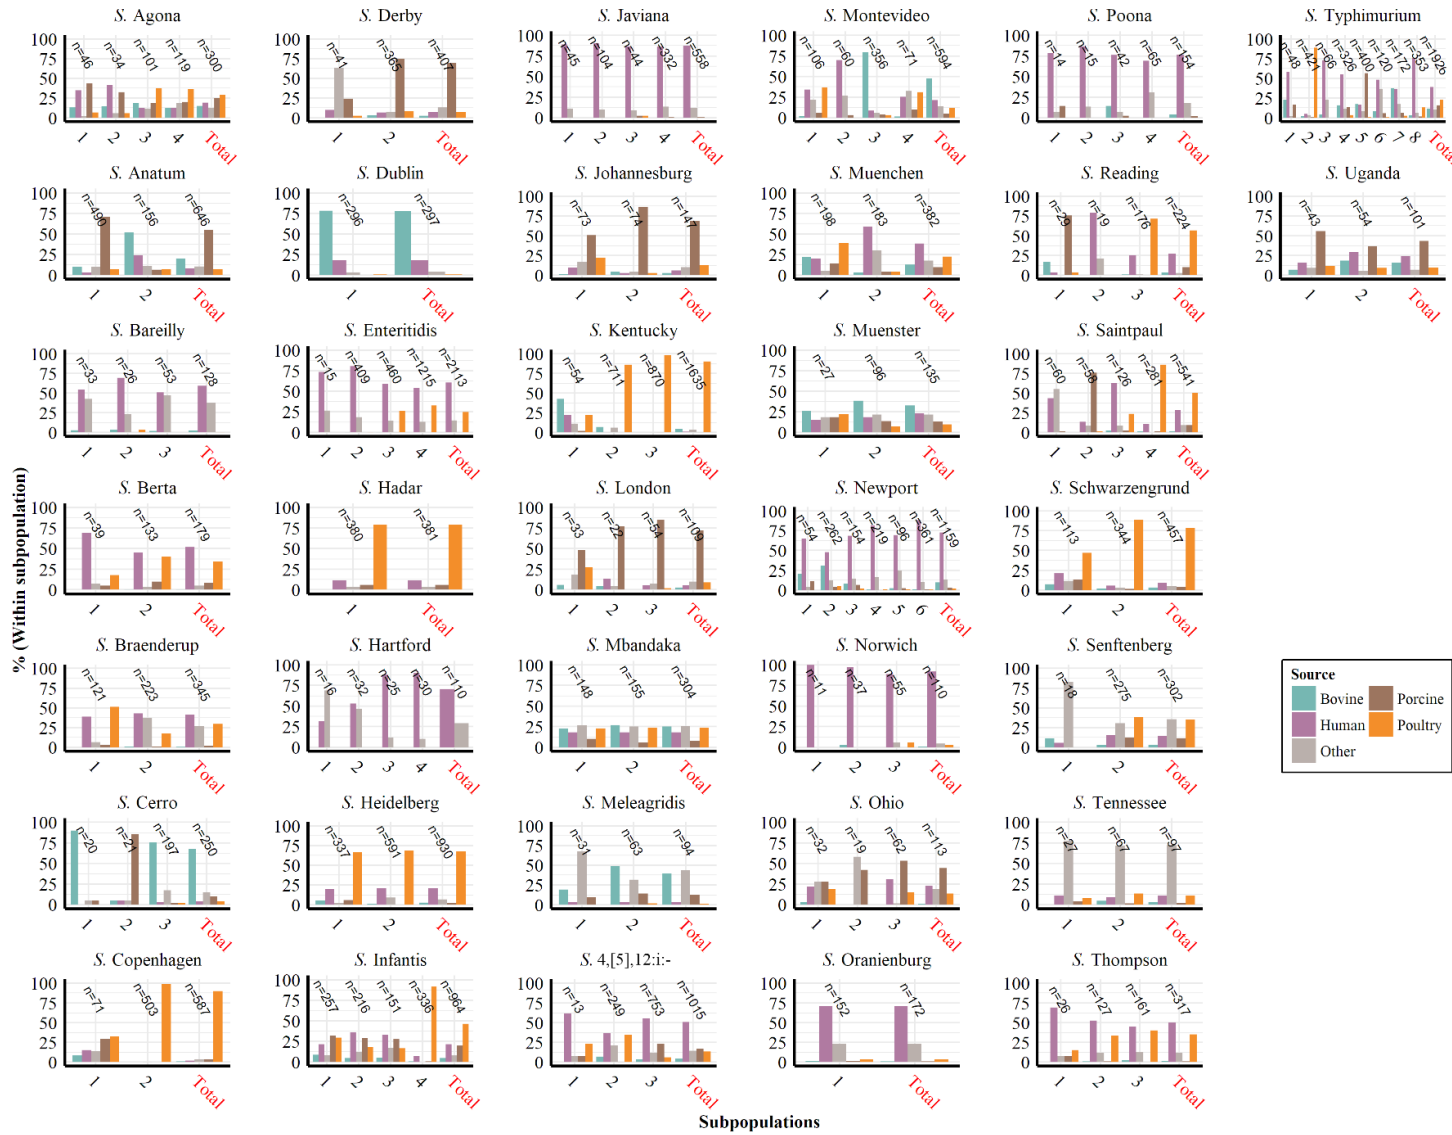

202

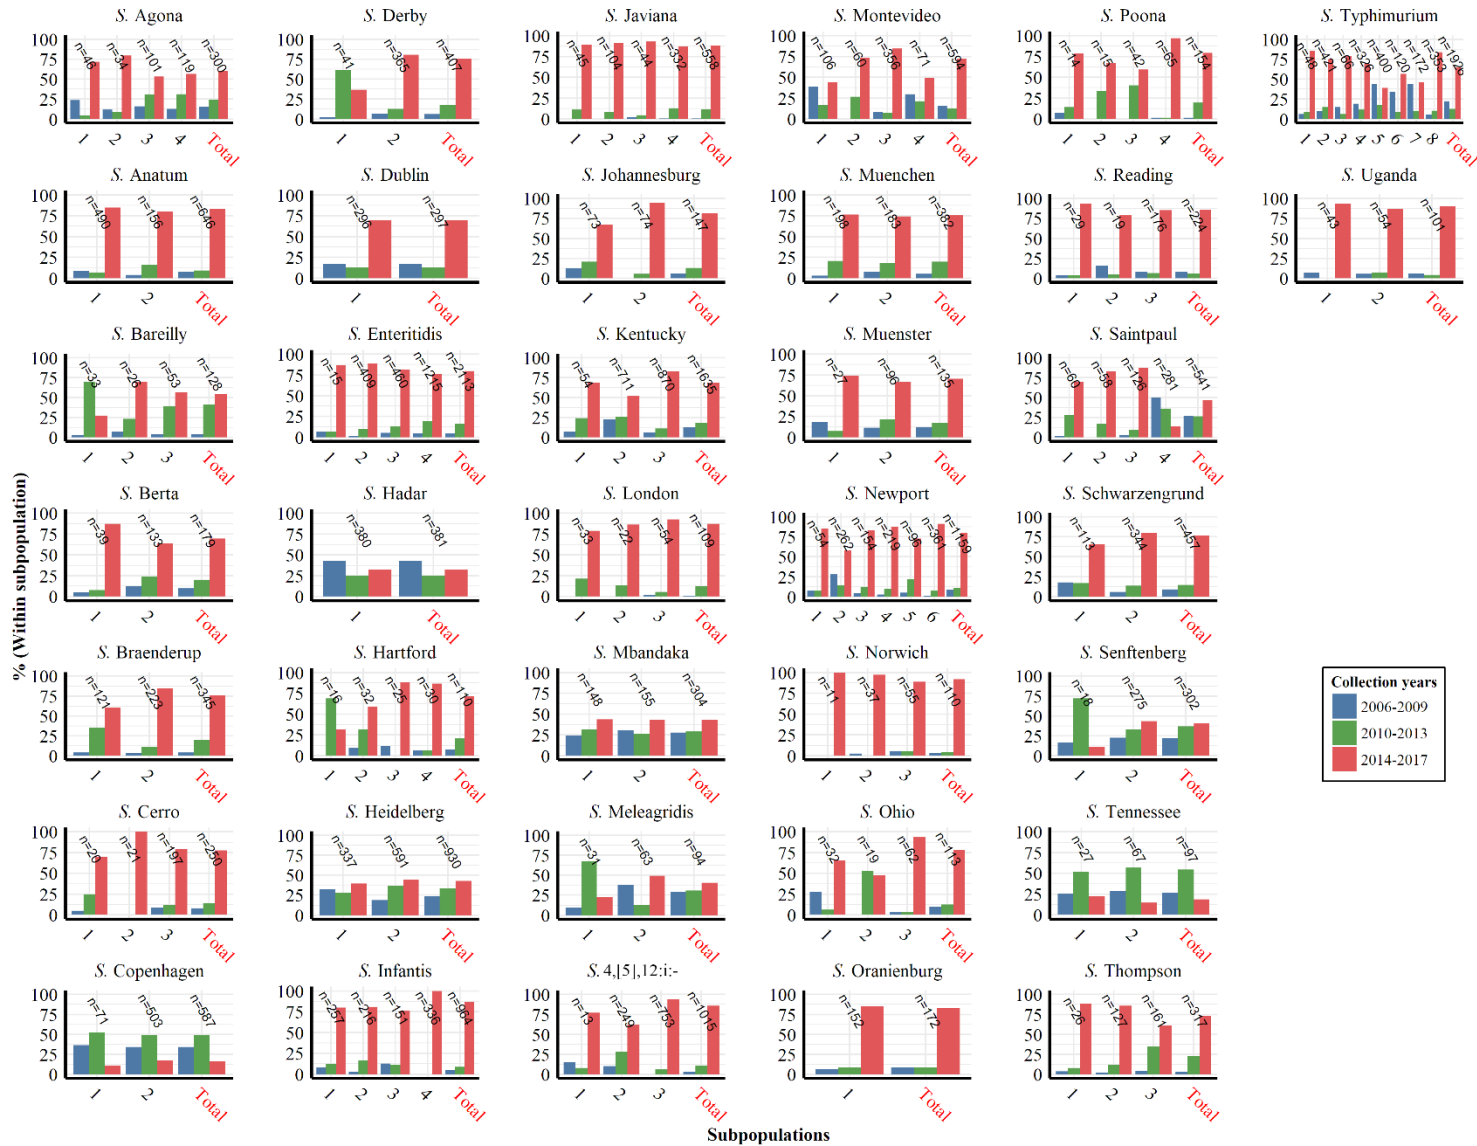

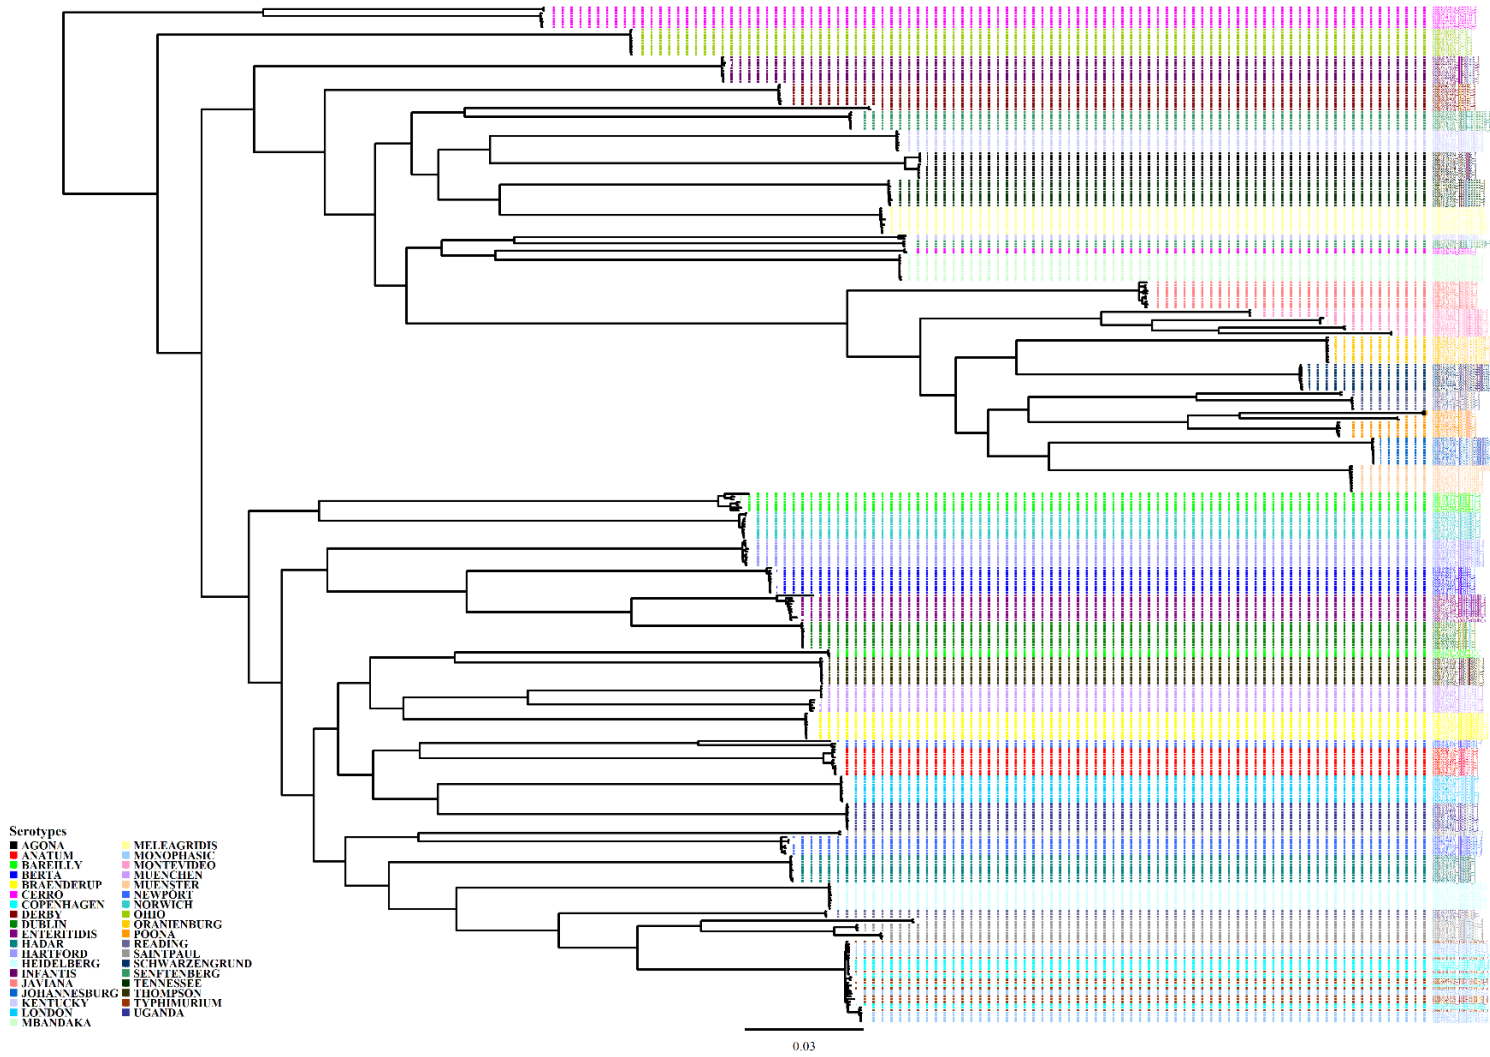

207 **Figure S5**

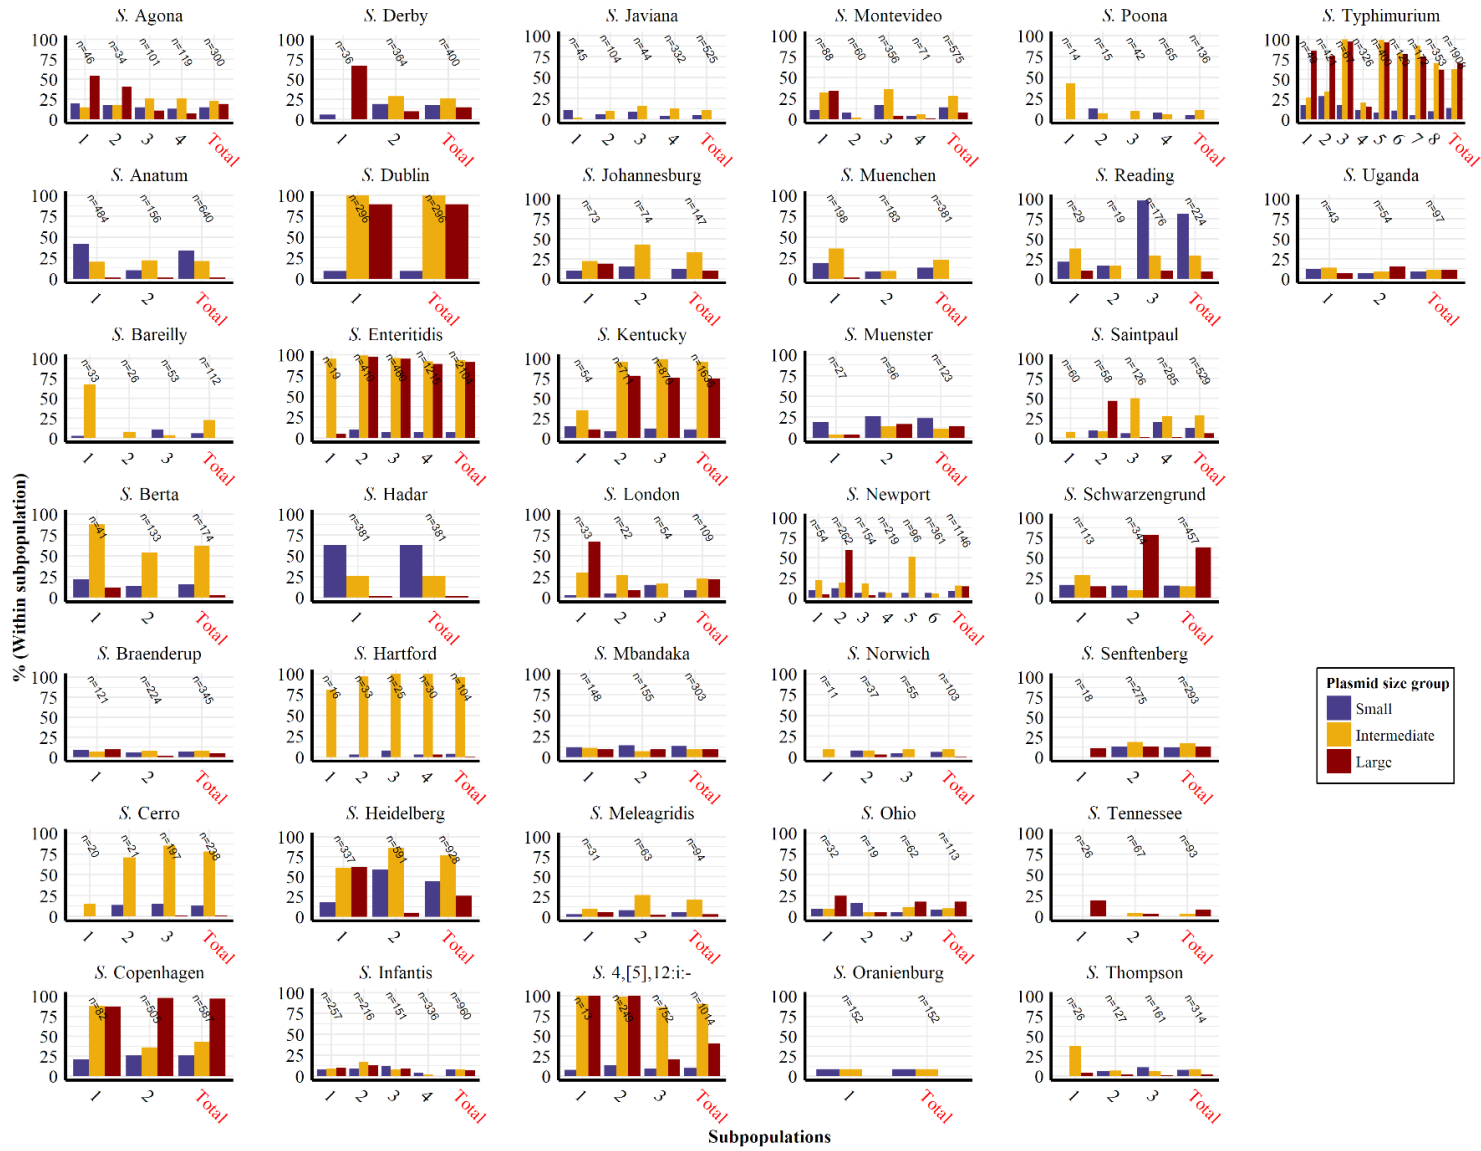

Supplement: mgen-6-425-s001.pdf [file mgen-6-425-s001.pdf]
